# Supplementary material for: Hepatic Metabolism of Sakuranetin and Its Modulating Effects on Cytochrome P450s and UDP-Glucuronosyltransferases
Source: MDPI journal article supplement (doi:10.3390/molecules23071542), 2018-06-26
Supplement: s1 [file s1]

# Hepatic Metabolism of Sakuranetin and Its Modulating Effects on Cytochrome P450s and UDP-Glucuronosyltransferases

Hyesoo Jeong<sup>1</sup>, Jimin Lee<sup>1</sup>, Soolin Kim<sup>1</sup>, Yoo Yeon Yeo<sup>2</sup>, Hyunyoung So<sup>2</sup>, Honghua Wu<sup>3</sup>, Yun Seon Song<sup>4</sup>, Chang Young Jang<sup>4</sup>, Hee-Doo Kim<sup>4</sup>, Min Jung Kim<sup>2</sup>, and Minsun Chang<sup>2,\*</sup>

<sup>1</sup> Graduate School of Biological Sciences, Sookmyung Women's University, Seoul, Republic of Korea; hyesoojeong@sookmyung.ac.kr (H.J.); petia13@naver.com (J.L.); soolinn@sookmyung.ac.kr (S.K.)

<sup>2</sup> Department of Biological Sciences, Sookmyung Women's University, Seoul 04310, Republic of Korea; yooyounyeo@sookmyung.ac.kr (Y.Y.Y.); sohy0131@sookmyung.ac.kr (H.S.); minking@sookmyung.ac.kr (M.J.K.)

<sup>3</sup> Center for Research and Development of Chinese Medicine Tianjin University of Traditional Chinese Medicine, Tianjin, China; wuhonghua2003@163.com

<sup>4</sup> College of Pharmacy, Sookmyung Women's University, Seoul 04310, Republic of Korea; yssong@sookmyung.ac.kr (Y.S.S.); cyjang@sookmyung.ac.kr (C.Y.J.); hdkim@sookmyung.ac.kr (H.D.K.)

\* Correspondence: minsunchang@sookmyung.ac.kr; Tel.: +82-2-2077-7626

## Supplementary Materials:

**Table S1.** CYP inhibition effects of naringenin and eriodictyol in human liver microsomes.

| CYP isozyme | Phenotyping reaction                             | Inhibition (%)          |                          |
|-------------|--------------------------------------------------|-------------------------|--------------------------|
|             |                                                  | Naringenin <sup>a</sup> | Eriodictyol <sup>b</sup> |
| 1A2         | Phenacetin <i>O</i> -deethylation (PCOD)         | 35.7 ± 2.6 <sup>c</sup> | 15.9 ± 1.8               |
| 2B6         | Bupropion hydroxylation (BPHY)                   | 24.0 ± 2.2              | 16.1 ± 0.9               |
| 2C9         | Diclofenac 4'-hydroxylation (DCHY)               | 9.1 ± 1.8               | 1.0 ± 0.7                |
| 2C9         | Tolbutamide 6-hydroxylation (TOLHY)              | 12.0 ± 0.7              | 7.7 ± 0.4                |
| 2D6         | Dextromethorphan <i>O</i> -demethylation (DEXOD) | 11.9 ± 1.4              | 5.6 ± 3.6                |
| 3A4         | Testosterone 6β-hydroxylation (TSTHY)            | 39.6 ± 2.2              | 3.2 ± 0.7                |

<sup>a,b</sup> % Inhibition was measured from incubation samples which includes human liver microsomes (0.5 mg/mL), a cofactor-generating system, and either naringenin (a, 10 μM) or eriodictyol (b, 10 μM) as an inhibitor. <sup>c</sup>Numbers represent the % inhibition. Metabolite formation in a CYP-mediated reaction in the absence of an inhibitor was set as 100%.

**Table S2.** UGT inhibition effects of naringenin and eriodictyol in human liver microsomes.

| UGT isozyme | Phenotyping reaction                             | Inhibition (%)          |                          |
|-------------|--------------------------------------------------|-------------------------|--------------------------|
|             |                                                  | Naringenin <sup>a</sup> | Eriodictyol <sup>b</sup> |
| 1A1         | $\beta$ -Estradiol 3-O-glucuronidation (ESG)     | 10.8 $\pm$ 3.0c         | 20.8 $\pm$ 3.4           |
| 1A3         | Chenodeoxycholic acid 24-glucuronidation (CDCAG) | 2.0 $\pm$ 0.9           | 15.7 $\pm$ 2.9           |
| 1A4         | Trifluoperazine N-glucuronidation (TFPG)         | 9.6 $\pm$ 3.1           | 13.7 $\pm$ 3.8           |
| 1A6         | 1-Naphthol $\beta$ -D-glucuronidation (NPG)      | 4.1 $\pm$ 3.1           | 1.9 $\pm$ 2.7            |
| 1A9         | Mycophenolic acid O-glucuronidation (MPAG)       | 2.0 $\pm$ 2.1           | 2.9 $\pm$ 0.8            |
| 2B7         | Zidovudine 5'-glucuronidation (AZTG)             | 6.0 $\pm$ 2.2           | 8.2 $\pm$ 1.4            |

<sup>a,b</sup> % Inhibition was measured from incubation samples which includes human liver microsomes (0.5 mg/mL), a cofactor-generating system, and either naringenin (a, 10  $\mu$ M) or eriodictyol (b, 10  $\mu$ M) as an inhibitor. <sup>c</sup>Numbers represent the % inhibition. Metabolite formation in a UGT-mediated reaction in the absence of an inhibitor was set as 100%.

**Table S3.** Selected ion monitoring parameters for quantification of glucuronides by HPLC-MS/MS

| Parameters.                   | 1A1 <sup>a</sup>      | 1A3                   | 1A4                   | 1A6                   | 1A7                   | 2B7                   |
|-------------------------------|-----------------------|-----------------------|-----------------------|-----------------------|-----------------------|-----------------------|
| Detection mode                | Negative              | Negative              | Positive              | Negative              | Negative              | Negative              |
| Capillary voltage             | -50                   | -10                   | 41                    | -41                   | -38                   | -43                   |
| Tube lens                     | -127.5                | -32.5                 | 170.0                 | -107.5                | -102.5                | -97.5                 |
| Analyte <i>m/z</i> transition | 447 $\rightarrow$ 271 | 567 $\rightarrow$ 391 | 584 $\rightarrow$ 408 | 319 $\rightarrow$ 112 | 495 $\rightarrow$ 391 | 442 $\rightarrow$ 125 |
| Retention time                | 9.5                   | 10.9                  | 11.3                  | 9.5                   | 10.2                  | 10.9                  |

<sup>a</sup> %The type of phenotyping reaction is referred from Table S2.
